# Supplementary material
Source: PubMed Central journal article supplement (PMC4369479)
Supplement: NIHMS621777-supplement-Supp_FigureS1-S3.pdf [file NIHMS621777-supplement-Supp_FigureS1-S3.pdf]

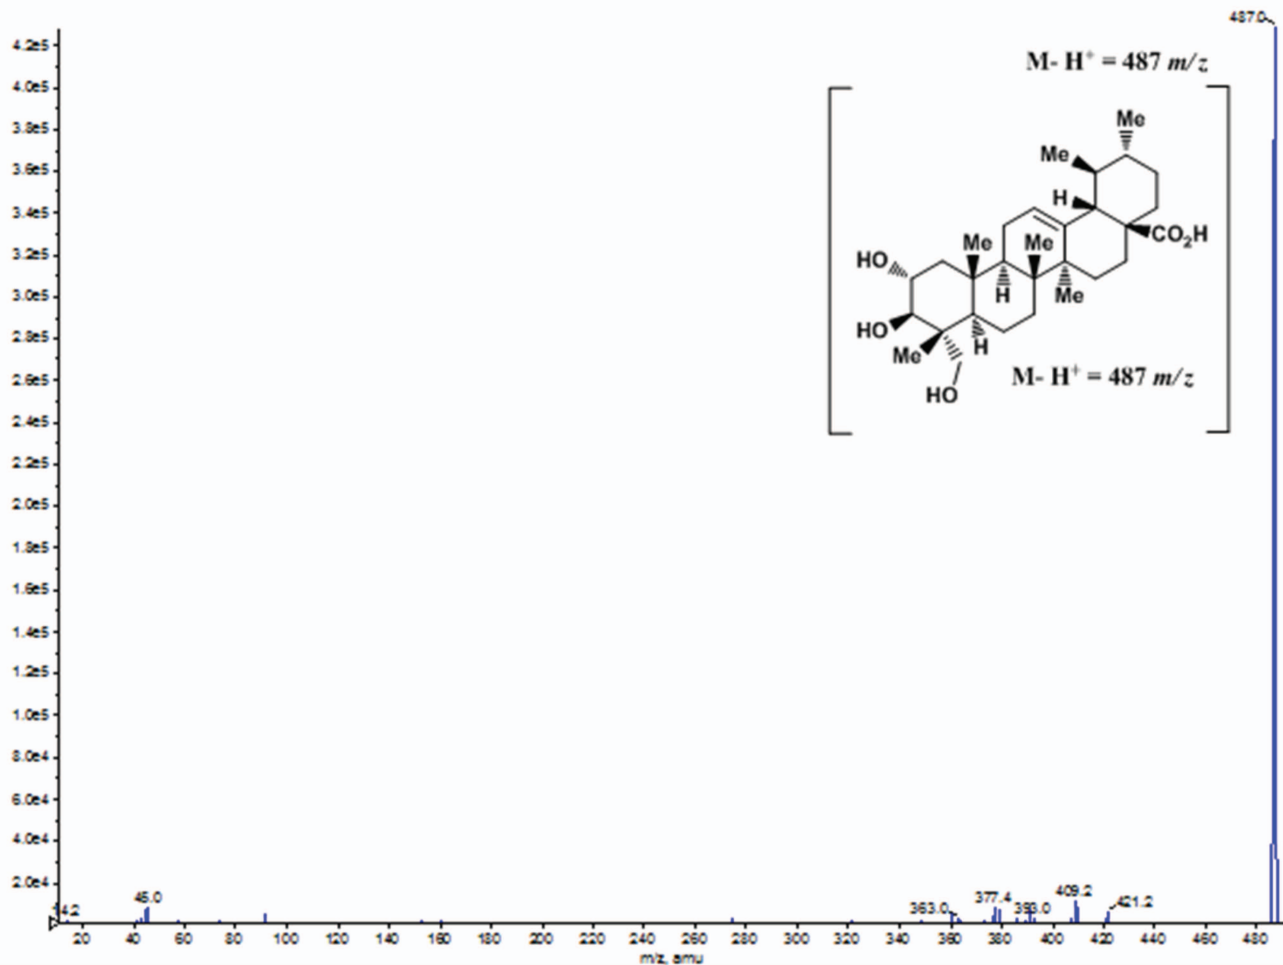

Kavitha et al.; Supplementary Figure 1

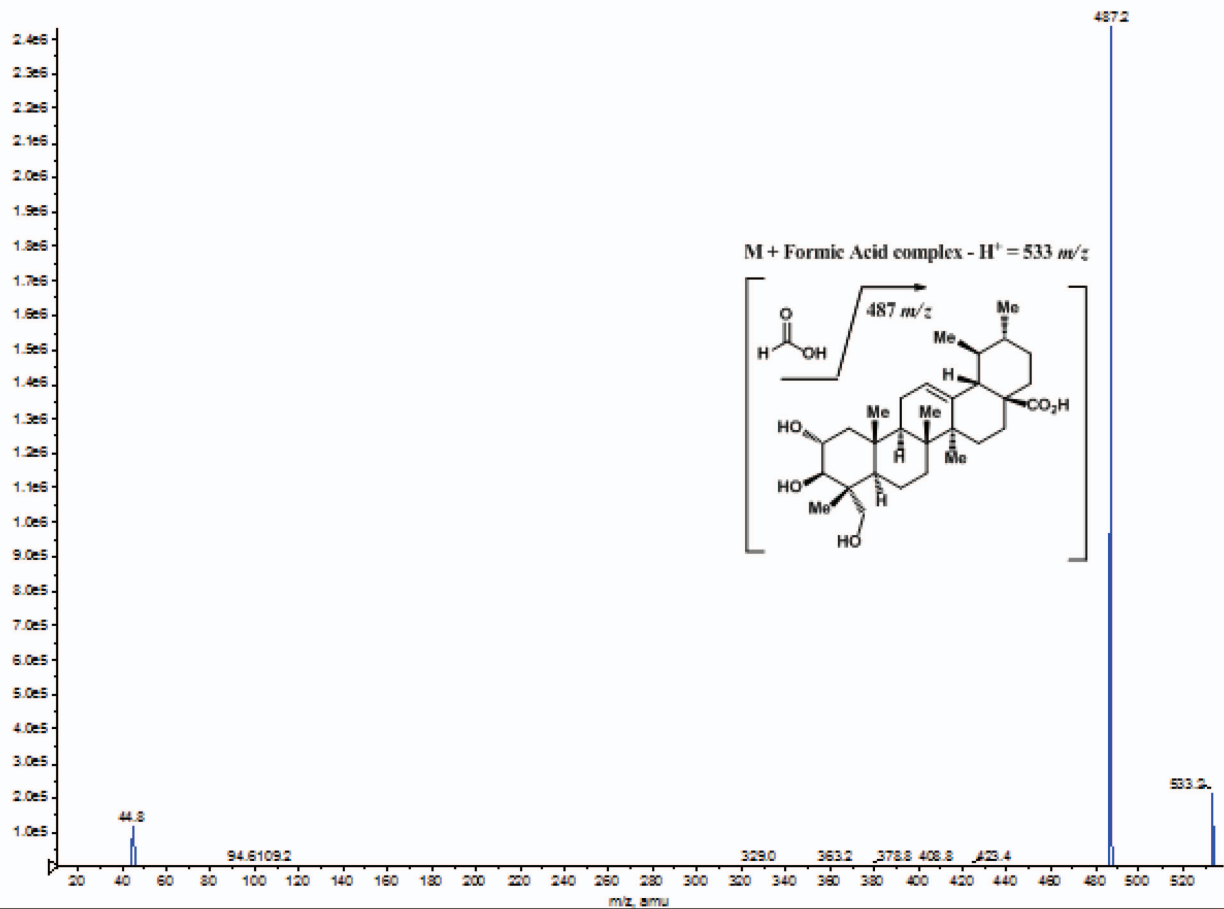

Kavitha et al.; Supplementary Figure 2

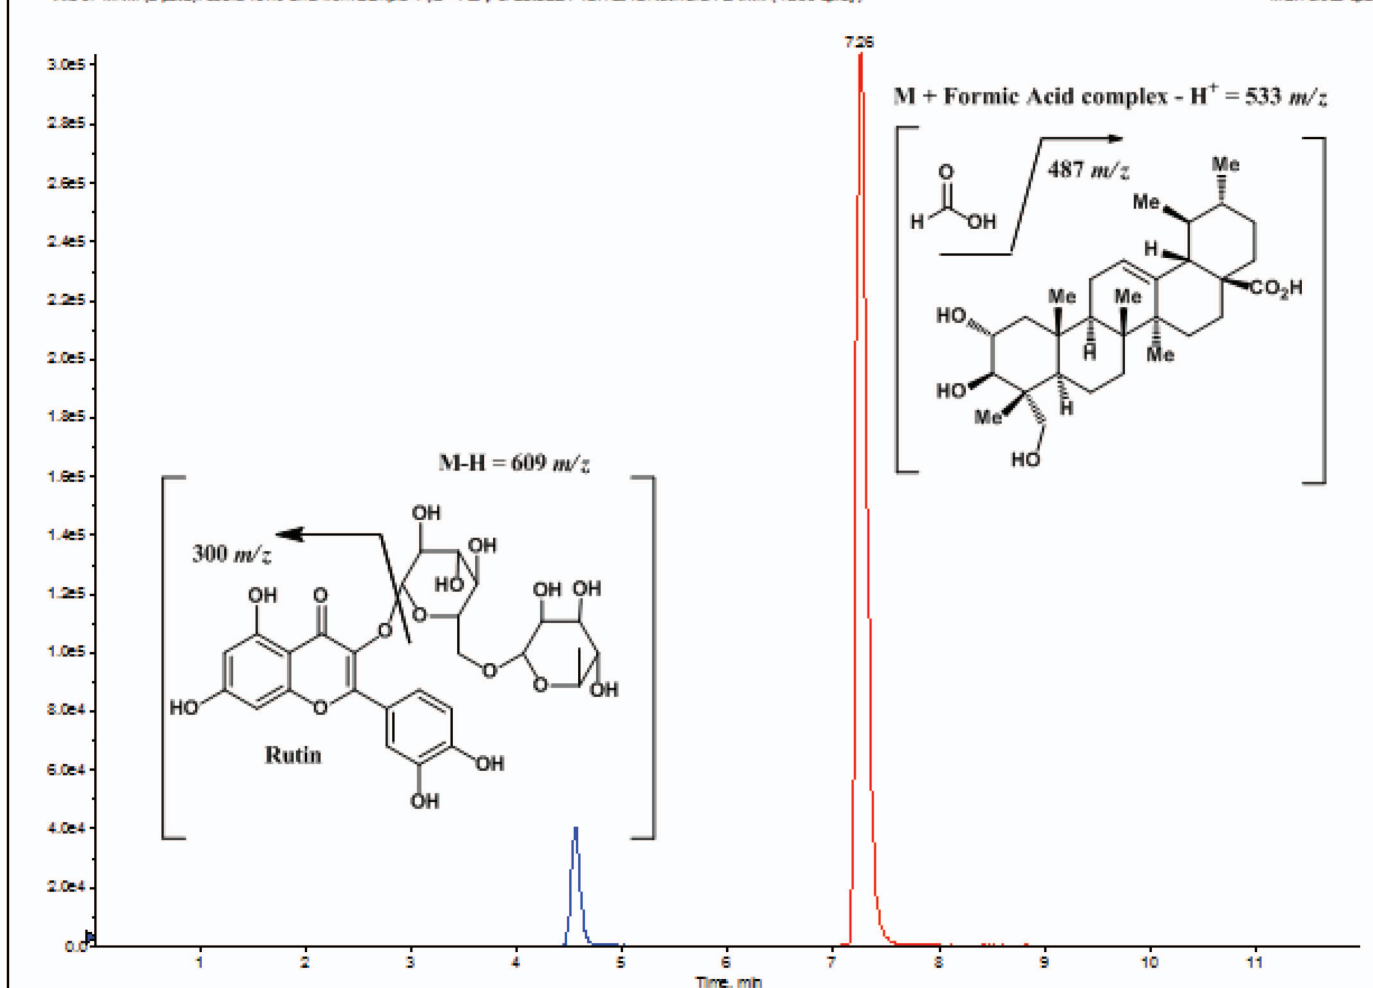

Kavitha et al.; Supplementary Figure 3
